# Supplementary material for: Human Liver Stem Cell Transplantation Alleviates Liver Fibrosis in a Rat Model of CCl4-Induced Liver Fibrosis
Source: PubMed Central journal article supplement — Int J Stem Cells. 2021 Oct 31;14(4):475–84. doi: 10.15283/ijsc21031 (PMC8611308; doi:10.15283/ijsc21031), 2021-10-31
Supplement: ijsc-14-4-475-supple.pdf [file ijsc-14-4-475-supple.pdf]

**Table S1.** CCl<sub>4</sub> duration and dosage in protocols for liver fibrosis induction

|                            | Liver fibrosis induction  |                       | Post-transplant maintenance |                       | Final histologic evaluation |
|----------------------------|---------------------------|-----------------------|-----------------------------|-----------------------|-----------------------------|
|                            | CCl <sub>4</sub> duration | CCl <sub>4</sub> dose | CCl <sub>4</sub> duration   | CCl <sub>4</sub> dose |                             |
| Moderate toxicity protocol | 8 weeks                   | 0.65 ml/kg            | 6 weeks                     | 0.5 ml/kg             | At 14 weeks                 |
| Intense toxicity protocol  | 10 weeks                  | 0.75 ml/kg            | 4 weeks                     | 0.5 ml/kg             | At 14 weeks                 |

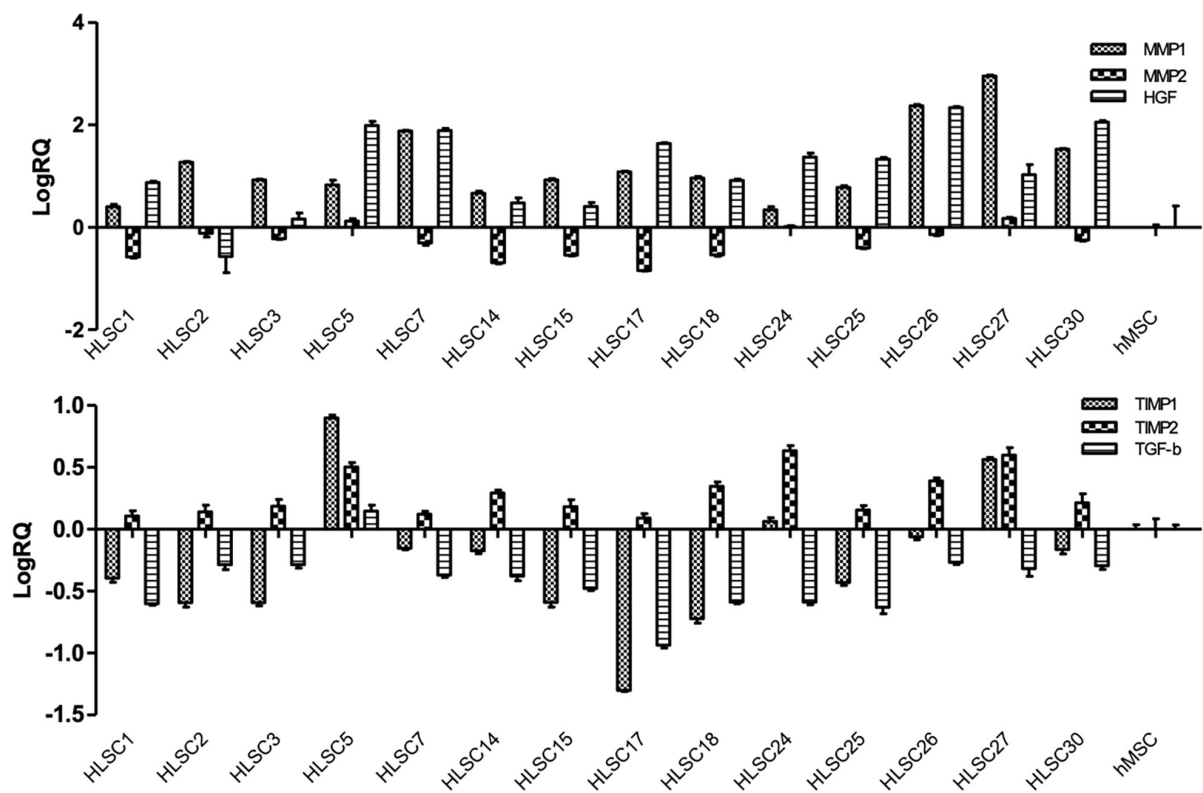

**Fig. S1.** Expression of ECM remodeling factors by HLSC strains. Results are expressed as relative values to expression of factors by human MSCs.
